# Supplementary material for: An Oily Fish Diet Improves Subclinical Inflammation in People at High Cardiovascular Risk: A Randomized Controlled Study
Source: MDPI journal article supplement (doi:10.3390/molecules26113369), 2021-06-02
Supplement: s1 [file s1]

**Supplementary Table 1.** Absolute changes<sup>a</sup> from baseline of the mean daily intakes (mg/day) of total dietary polyphenols and their classes in the study groups

|                   | High-polyphenol diets<br>(n = 39) |        | Low-polyphenol diets<br>(n = 39) |       |
|-------------------|-----------------------------------|--------|----------------------------------|-------|
|                   | mg/day                            | %*     | mg/day                           | %*    |
| Total polyphenols | 2025 ± 574                        | + 305  | – 239 ± 294                      | – 39  |
| Phenolic acids    | 628 ± 322                         | + 125  | – 216 ± 300                      | – 40  |
| Total flavonoids  | 1360 ± 303                        | + 1782 | – 22.6 ± 39                      | – 35  |
| Anthocyanidins    | 78.2 ± 47                         | + 844  | 13.0 ± 15                        | + 124 |
| Flavones          | 4.50 ± 2.5                        | + 227  | 0.60 ± 1.7                       | + 33  |
| Flavan-3-ols      | 1007 ± 266                        | + 4698 | – 20.5 ± 16                      | – 99  |
| Flavonols         | 208 ± 78                          | + 990  | – 4.5 ± 7.9                      | – 39  |
| Flavanones        | 62.1 ± 46                         | + 277  | – 11.2 ± 28                      | – 51  |

Data are expressed as mean ± SD

\*Percentage increase/decrease from baseline calculates as: [(8-week value minus baseline value)/baseline value] × 100

<sup>a</sup> Calculated as 8-week value minus baseline value
